# Supplementary material for: Characterization of active and total fungal communities in the atmosphere over the Amazon rainforest
Source: Copernicus journal article supplement (doi:10.5194/bg-12-6337-2015), 2015-11-06
Supplement: Supplementary file 1 [file bg-12-6337-2015-supplement.pdf]

Supplement of Biogeosciences, 12, 6337–6349, 2015  
<http://www.biogeosciences.net/12/6337/2015/>  
doi:10.5194/bg-12-6337-2015-supplement  
© Author(s) 2015. CC Attribution 3.0 License.

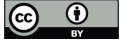

*Supplement of*

## **Characterization of active and total fungal communities in the atmosphere over the Amazon rainforest**

**A. M. Womack et al.**

*Correspondence to:* A. M. Womack (womack.ann@gmail.com)

The copyright of individual parts of the supplement might differ from the CC-BY 3.0 licence.

1 Table S1. Barcodes and adapter/sequencing primers for metatranscriptome

| Sample  | Barcode | 5' adapter/sequencing primer               | 3' adapter/sequencing primer               |
|---------|---------|--------------------------------------------|--------------------------------------------|
| Dec .8  | AAACT   | AGTTTAGATCGGAAGAGCGGTTC<br>AGCAGGAATGCCGAG | ACACTCTTTCCCTACACGA<br>CGCTCTTCCCATCTAAACT |
| Dec. 9  | AAAGC   | AGTTTAGATCGGAAGAGCGGTTC<br>AGCAGGAATGCCGAG | ACACTCTTTCCCTACACGA<br>CGCTCTTCCCATCTAAACT |
| Dec. 10 | AACAA   | AGTTTAGATCGGAAGAGCGGTTC<br>AGCAGGAATGCCGAG | ACACTCTTTCCCTACACGA<br>CGCTCTTCCCATCTAAACT |
| Dec. 11 | AACTG   | AGTTTAGATCGGAAGAGCGGTTC<br>AGCAGGAATGCCGAG | ACACTCTTTCCCTACACGA<br>CGCTCTTCCCATCTAAACT |

2

3 Table S2. LSU barcodes and primers

| Sample  | Forward barcode | Reverse barcode | Full barcode | Forward primer (LR0R) | Reverse primer (LR3)  |
|---------|-----------------|-----------------|--------------|-----------------------|-----------------------|
| Dec .8  | TAATTC          | AATATC          | AATATCTAATTC | ACCCGCTGA<br>ACTTAAGC | CCGTGTTTC<br>AAGACGGG |
| Dec. 9  | TACACA          | AATATC          | AATATCTACACA | ACCCGCTGA<br>ACTTAAGC | CCGTGTTTC<br>AAGACGGG |
| Dec. 10 | CCCTAA          | AATATC          | AATATCCCCTAA | ACCCGCTGA<br>ACTTAAGC | CCGTGTTTC<br>AAGACGGG |
| Dec. 11 | CCGAGG          | AATATC          | AATATCCCGAGG | ACCCGCTGA<br>ACTTAAGC | CCGTGTTTC<br>AAGACGGG |

4

5 Table S3. Air sequence summary statistics

| Sample  | # Metatranscriptome Sequences | # rRNA sequences (metatranscriptome) | # LSU amplicon sequences |
|---------|-------------------------------|--------------------------------------|--------------------------|
| Dec. 8  | 331,765                       | 51,361                               | 5,377                    |
| Dec. 9  | 601,828                       | 97,871                               | 20,766                   |
| Dec. 10 | 0                             | 0                                    | 18,778                   |
| Dec. 11 | 4,231,592                     | 1,766,762                            | 10,493                   |

6

7

8

9

1 Table S3. Relative abundances of fungal families

|                    | Total |       |       |       | Active |       |       |
|--------------------|-------|-------|-------|-------|--------|-------|-------|
|                    | 12/8  | 12/9  | 12/10 | 12/11 | 12/8   | 12/9  | 12/11 |
| Sordariomycetidae  | 0.00  | 0.00  | 0.00  | 0.00  | 1.11   | 4.63  | 5.06  |
| Lachnocladiaceae   | 0.34  | 3.74  | 2.66  | 4.37  | 0.03   | 0.00  | 0.03  |
| Capnodiales family | 10.86 | 0.29  | 0.40  | 0.37  | 0.20   | 0.00  | 0.03  |
| Hymenochaetaceae   | 2.77  | 2.43  | 4.37  | 3.40  | 0.03   | 0.03  | 0.31  |
| Saccharomycetaceae | 0.09  | 1.66  | 0.54  | 0.06  | 1.89   | 2.60  | 7.57  |
| Sclerotiniaceae    | 0.57  | 0.00  | 0.06  | 0.00  | 9.57   | 8.86  | 3.31  |
| Mycosphaerellaceae | 0.46  | 0.11  | 0.31  | 0.14  | 10.29  | 8.46  | 3.23  |
| Schizoporaceae     | 6.26  | 8.46  | 8.63  | 5.91  | 0.00   | 0.00  | 0.09  |
| Coriolaceae        | 10.43 | 7.20  | 7.54  | 8.63  | 0.20   | 0.00  | 0.20  |
| Physciaceae        | 0.00  | 0.00  | 0.00  | 0.00  | 19.34  | 21.03 | 7.86  |
| Xylariaceae        | 0.51  | 0.31  | 0.54  | 0.97  | 20.49  | 22.57 | 9.74  |
| Polyporaceae       | 40.37 | 42.11 | 45.97 | 40.49 | 0.09   | 0.14  | 0.63  |
| Other family       | 27.34 | 33.69 | 28.97 | 35.66 | 36.77  | 31.69 | 61.94 |

2  
3  
4  
5  
6  
7  
8  
9  
10

1 Table S4. IN taxa in Figure S1 that were detected in Amazon air samples. Counts are based on  
 2 rarefied data.

| Genus name          | # Total | # Active | Temp (°C)  | Reference(s)                                                      |
|---------------------|---------|----------|------------|-------------------------------------------------------------------|
| <i>Agaricus</i>     | 0       | 1        | -28        | Haga et al., 2014                                                 |
| <i>Amanita</i>      | 0       | 3        | -26        | Haga et al., 2014                                                 |
| <i>Aspergillus</i>  | 0       | 2        | -28        | Haga et al., 2014                                                 |
| <i>Boletus</i>      | 0       | 1        | -27        | Haga et al., 2014                                                 |
| <i>Cladosporium</i> | 2       | 0        | -15 to -28 | Jayaweera and Flanagan, 1982;<br>Iannone et al., 2011             |
| <i>Fusarium</i>     | 1       | 0        | -5 to -1   | Pouleur et al., 1992; Tsumuki<br>et al. 1992; Richard et al. 1996 |
| <i>Lepsita</i>      | 0       | 1        | -17        | Haga et al., 2014                                                 |
| <i>Mortierella</i>  | 0       | 15       | -5         | Fröhlich-Nowoisky et al., 2015                                    |
| <i>Acremonium</i>   | 8       | 0        | -5         | Huffman et al., 2013                                              |
| <i>Puccinia</i>     | 0       | 1        | -9 to -4   | Morris et al., 2013                                               |
| <i>Rhizopus</i>     | 6       | 13       | -23        | Jayaweera and Flanagan, 1982                                      |
| <i>Cladonia</i>     | 0       | 2        | -6.3       | Kieft and Ahmadjian, 1989                                         |

1 Table S5. Multi-environment sequence summary statistics

| Study                          | # Samples | # Sequences | Biome                        | Gene region | Total # OTUs |
|--------------------------------|-----------|-------------|------------------------------|-------------|--------------|
| Barnard et al., 2013           | 60        | 151,125     | Temperate grassland soil     | D1-D2       | 6,872        |
| Kerekes et al., 2013           | 36        | 26,390      | Tropical forest soil         | D1-D2       | 3,524        |
| Kembel and Mueller, 2014       | 100       | 771,562     | Tropical forest phyllosphere | D1-D2       | 21,379       |
| Penton et al., 2013            | 16        | 82,618      | Tundra soil                  | D1-D3       | 1,386        |
| Penton et al., 2013            | 12        | 93,994      | Temperate grassland soil     | D1-D3       | 2,288        |
| Penton et al., 2014            | 48        | 451,769     | Temperate grassland soil     | D1-D2       | 8,221        |
| This study (amplicons)         | 4         | 55,414      | Tropical forest air (DNA)    | D1-D2       | 535          |
| This study (metatranscriptome) | 3         | 1,915,994   | Tropical forest air (RNA)    | na          | 441          |

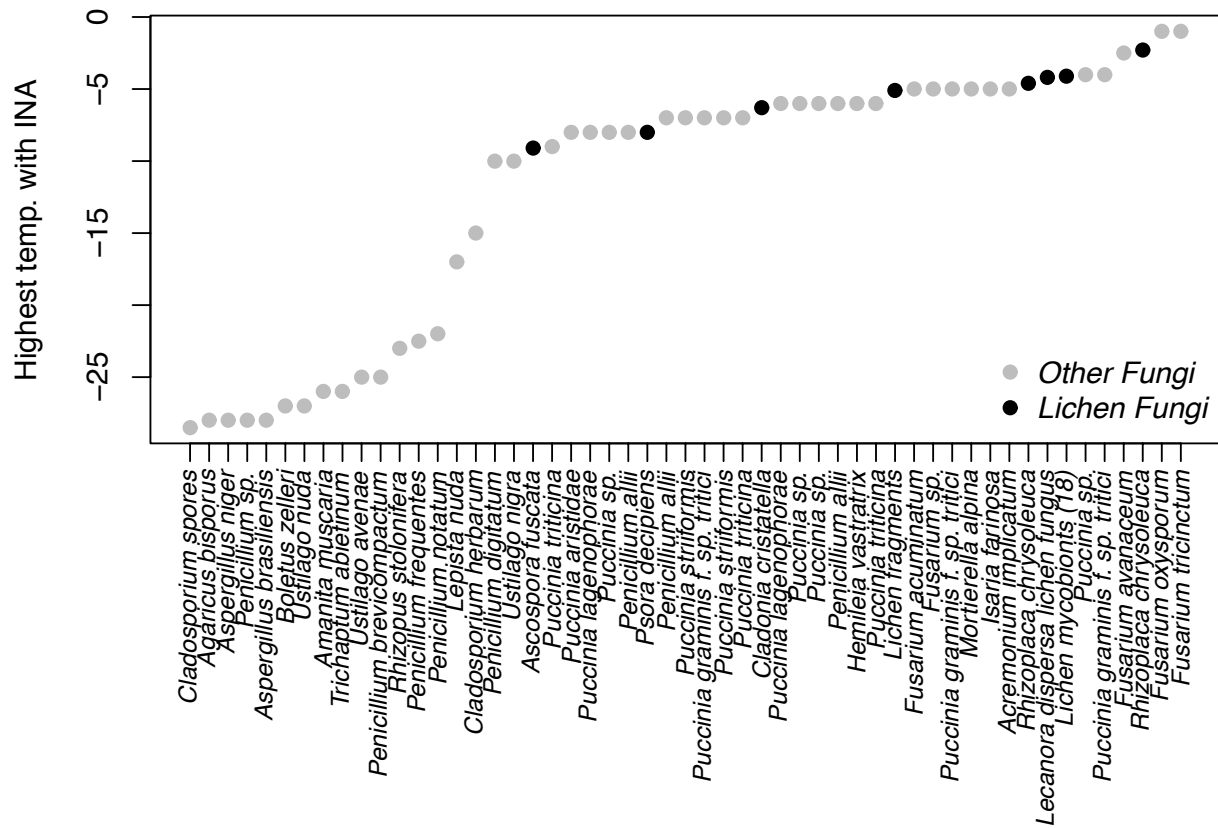

1  
 2 Figure S1. Highest temperatures with ice nucleation activity (INA) in lichens and other fungi.  
 3 Species that occur more than once were measured in multiple studies. Data compiled from  
 4 Després et al., 2012, Fröhlich-Nowoisky et al., 2015, Haga et al., 2014, Morris et al., 2013.

5  
 6

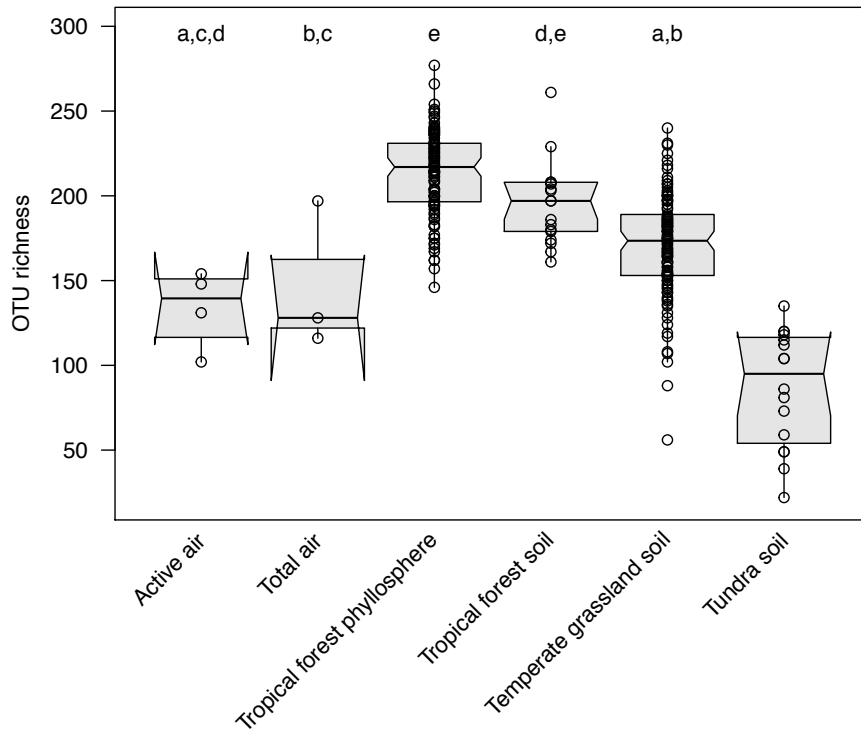

1  
 2 Figure S2. OTU richness significantly varied among environment types (ANOVA,  $F(5,237) =$   
 3  $66.89$ ,  $p < 0.001$ ). Letters above each box indicate non-significant pairs after Tukey's honestly  
 4 significant difference (HSD) test (adjusted p-value  $> 0.05$ ).

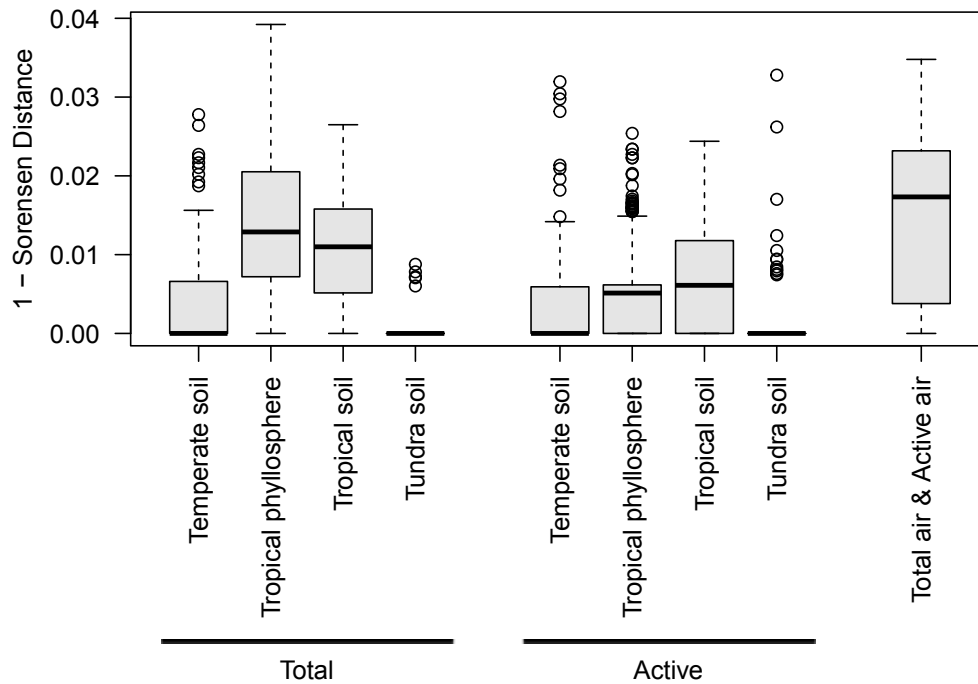

1  
 2 Figure S3. Similarity between air communities and potential source environments significantly  
 3 differed among environments (ANOVA,  $F(8,1655) = 106.4, p < 0.001$ ). Post-hoc Tukey's HSD  
 4 test showed that total and active air communities were most similar to tropical phyllosphere and  
 5 tropical soil communities. The following results were significant at  $p < 0.001$ . Total air  
 6 communities were most similar to tropical phyllosphere communities than to temperate soil,  
 7 tundra soil, and tropical soil. Active air communities were more similar to tropical soil than  
 8 tundra soil and temperate soil and were more similar to tropical phyllosphere communities than to  
 9 temperate soil. There was no significant difference in similarity between tropical soil and  
 10 phyllosphere communities.
